# Supplementary material for: A reliable and stable ratiometric luminescence thermometer based on dual near-infrared emission in a Cr3+-doped LaSr2Ga11O20 phosphor
Source: Royal Society of Chemistry journal article supplement (doi:10.1039/d3tc01232h), 2023-01-01
Supplement: d3tc01232h1.pdf [file d3tc01232h1.pdf]

## Supporting Information

### **Reliable and stable ratiometric luminescent thermometer based on dual near-infrared emission in Cr<sup>3+</sup>-doped LaSr<sub>2</sub>Ga<sub>11</sub>O<sub>20</sub> phosphor**

Xihui Shan,<sup>a</sup> Michele Back,<sup>b</sup> Dongxun Chen,<sup>a</sup> Shihai Miao,<sup>a</sup> Ruiqi Shi<sup>a</sup> and Yanjie Liang<sup>\*a</sup>

<sup>a</sup>Key Laboratory for Liquid-Solid Structure Evolution and Processing of Materials, Ministry of Education, Shandong University, Jinan 250061, P. R. China

<sup>b</sup>Department of Molecular Sciences and Nanosystems, Ca' Foscari University of Venice, Venice 30172, Italy

\*Corresponding author: Yanjie Liang

E-mail: [yanjie.liang@sdu.edu.cn](mailto:yanjie.liang@sdu.edu.cn)

## **Experimental details**

### **Synthesis**

LaSr<sub>2</sub>Ga<sub>11</sub>O<sub>20</sub>:Cr<sup>3+</sup> phosphors were prepared by conventional high-temperature solid-state reaction method. Stoichiometric amounts of La<sub>2</sub>O<sub>3</sub>, SrCO<sub>3</sub>, Ga<sub>2</sub>O<sub>3</sub>, and Cr<sub>2</sub>O<sub>3</sub> were weighed accurately and ground in an alumina mortar to form a homogeneous fine powder. The mixed powder was pre-fired at 900 °C in air for 2 h and cooled down to room temperature naturally. The pre-fired material was again ground to a fine powder. After that, the obtained powder was fired at 1400 °C for 6 h in air. After cooling down to room temperature naturally, the samples were ground again to acquire the final phosphors.

### **Characterization**

The XRD measurements were done on a DMAX-2500PC Powder X-ray diffractometer (normal scanning rate: 10°/min, 10–70°; parameters for refinement: 0.02° step size, 10 s counting time, 10–70°). The TOPAS academic software was used for crystal structure refinement. The morphology and energy-disperse X-ray spectroscopy (EDS) of the as-synthesized phosphor were measured by a JSM-7800F field-emission scanning electron microscope (FE-SEM). The photoluminescence measurements were done using an FLS1000 spectrofluorometer (Edinburgh Instruments) loaded with a photomultiplier tube detector (PMT, 200–900 nm), and a 400 W Xe lamp was used as the excitation source. UH4150 spectrophotometer equipped with an integrating sphere was used to measure the diffuse reflection spectra. The low-temperature PL and PLE spectra (77 K) and temperature-dependent PL spectra (100–460 K range) were measured using an OptistatDN cryostat (Oxford Instruments) equipped with a MercuryiTC temperature-controlled system.

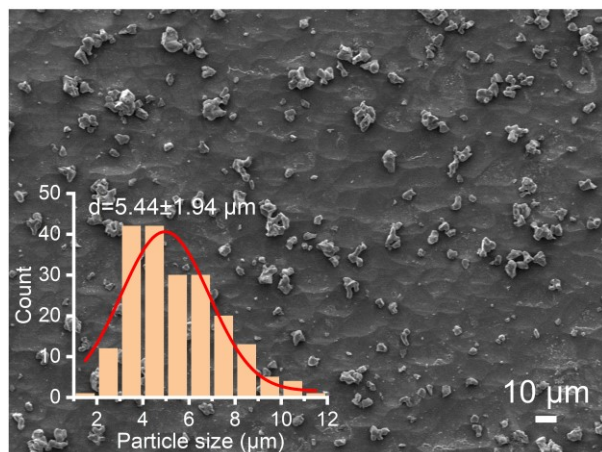

**Fig. S1** SEM image of the  $\text{LaSr}_2\text{Ga}_{11}\text{O}_{20}:\text{3\%Cr}^{3+}$  phosphor. The inset is particle size distributions of the phosphor.

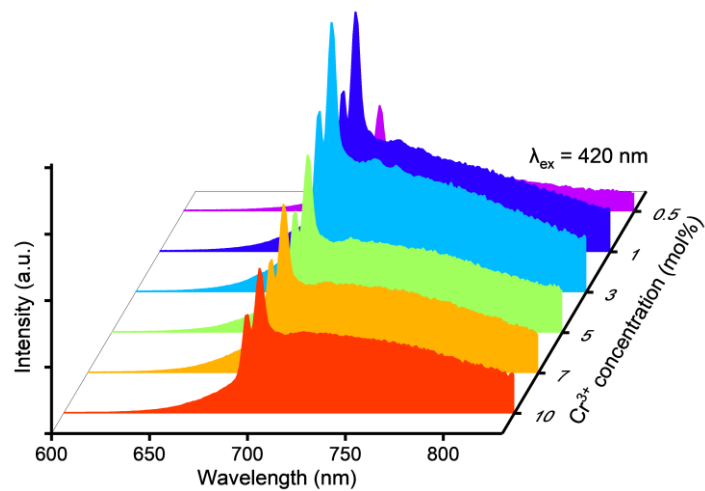

**Fig. S2** Concentration-dependent emission spectra of LaSr<sub>2</sub>Ga<sub>11</sub>O<sub>20</sub>:x%Cr<sup>3+</sup> ( $x = 0.5, 1, 3, 5, 7, \text{ and } 10$ ) phosphors under 420 nm excitation.

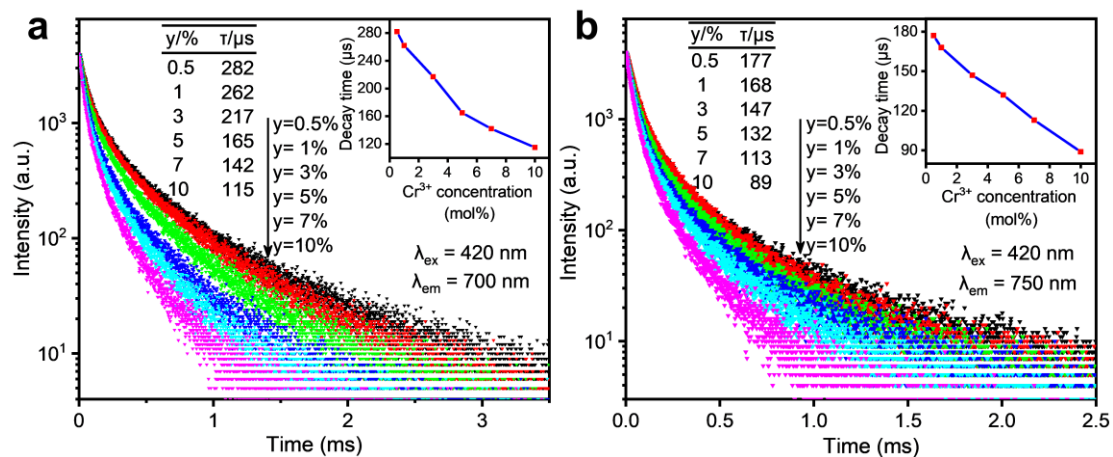

**Fig. S3** Decay curves of  $\text{LaSr}_2\text{Ga}_{11}\text{O}_{20}:\text{Cr}^{3+}$  phosphors under different  $\text{Cr}^{3+}$  doping concentrations under excitation at 420 nm, monitored at (a) 700 nm and (b) 750 nm, respectively. The upper inset is the dependence of the fluorescence lifetime on the  $\text{Cr}^{3+}$  concentration.

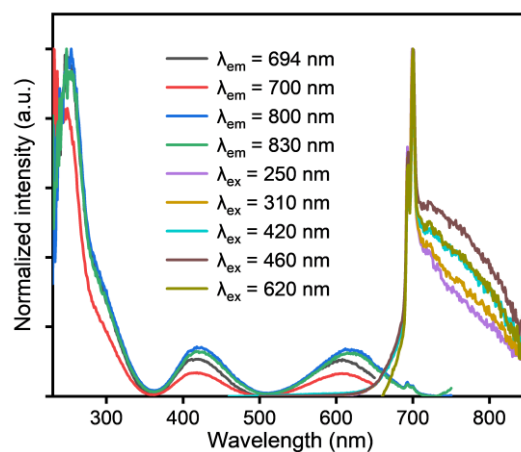

**Fig. S4** Normalized photoluminescence and excitation spectra of LaSr<sub>2</sub>Ga<sub>11</sub>O<sub>20</sub>:3%Cr<sup>3+</sup> phosphor at room temperature.

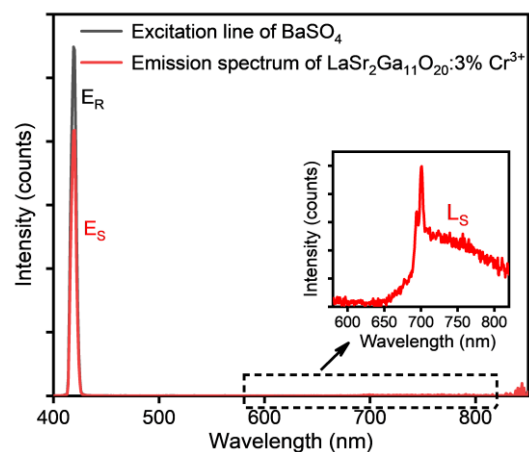

**Fig. S5** Excitation line of BaSO<sub>4</sub> and emission spectrum of the LaSr<sub>2</sub>Ga<sub>11</sub>O<sub>20</sub>:3%Cr<sup>3+</sup> phosphor collected using an integrating sphere. The inset shows a magnification of the emission spectrum.

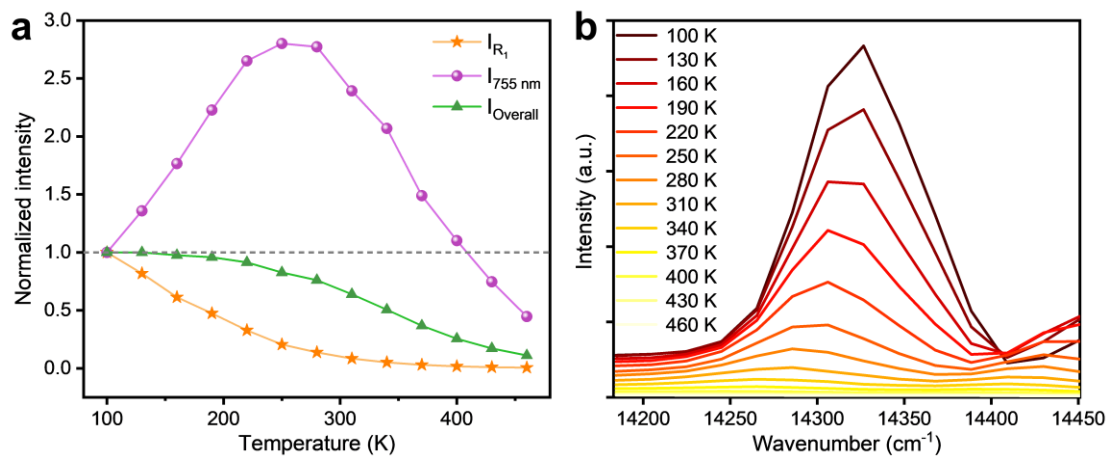

**Fig. S6** (a) Temperature dependence of the PL intensity for both the  ${}^2\text{E} \rightarrow {}^4\text{A}_2$  and  ${}^4\text{T}_2 \rightarrow {}^4\text{A}_2$  transitions and the overall PL intensity. (b) Spectral shift of the R<sub>1</sub>-line as a function of temperature in the 100–460 K range.



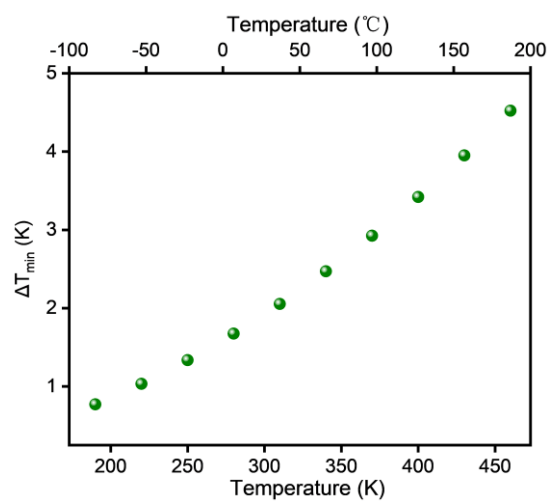

**Fig. S7** Temperature dependence of thermal resolution  $\Delta T_{\min}$  in the range of linearity of the Boltzmann law.

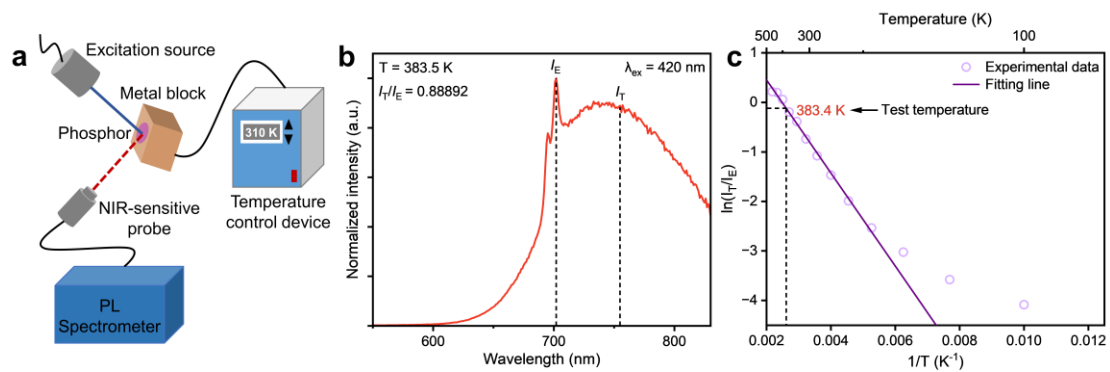

**Fig. S8** (a) Demonstration of measuring the temperature of a metal block. The  $\text{LaSr}_2\text{Ga}_{11}\text{O}_{20}:3\%\text{Cr}^{3+}$  phosphor was placed at the surface of a metal block. The temperature of the metal block was adjusted by a temperature control device. After holding for 5 min at a certain temperature, the PL emission spectrum of the phosphor was recorded with a spectrofluorometer. (b) PL emission spectrum of the  $\text{LaSr}_2\text{Ga}_{11}\text{O}_{20}:3\%\text{Cr}^{3+}$  phosphor located on the surface when the metal block is heated to 383.5 K. (c) Test temperature of the metal block obtained by the  $I_T/I_E$  value from (b) and the plot of  $\ln(I_T/I_E)$  versus  $T^{-1}$  to calibrate the  $\text{LaSr}_2\text{Ga}_{11}\text{O}_{20}:\text{Cr}^{3+}$  Boltzmann optical thermometer.

**Table S1** Rietveld refinement parameters of the  $\text{LaSr}_2\text{Ga}_{11}\text{O}_{20}:3\%\text{Cr}^{3+}$  phosphor.

| Sample                   | $\text{LaSr}_2\text{Ga}_{11}\text{O}_{20}:3\%\text{Cr}^{3+}$ |
|--------------------------|--------------------------------------------------------------|
| Space group              | I2/m                                                         |
| a (Å)                    | 14.56872(17)                                                 |
| b (Å)                    | 11.63243(13)                                                 |
| c (Å)                    | 5.072881(58)                                                 |
| $\alpha=\gamma$ (°)      | 90                                                           |
| $\beta$ (°)              | 91.260(2)                                                    |
| Volume (Å <sup>3</sup> ) | 606.224(29)                                                  |
| $R_{\text{wp}}$          | 5.103%                                                       |
| $R_{\text{p}}$           | 3.511%                                                       |
| $R_{\text{exp}}$         | 0.723%                                                       |

**Table S2** Spectroscopic parameters of Cr<sup>3+</sup> in LaSr<sub>2</sub>Ga<sub>11</sub>O<sub>20</sub>.

| Spectroscopic parameters                                                                                       | LaSr <sub>2</sub> Ga <sub>11</sub> O <sub>20</sub> :Cr <sup>3+</sup> |
|----------------------------------------------------------------------------------------------------------------|----------------------------------------------------------------------|
| E( <sup>2</sup> E) (R-line energy)                                                                             | 14320 cm <sup>-1</sup> (corresponding to 698.3 nm)                   |
| E( <sup>4</sup> T <sub>2</sub> ) <sub>ZPL</sub> (ZPL energy of <sup>4</sup> T <sub>2</sub> )                   | 14925 cm <sup>-1</sup>                                               |
| E <sub>abs</sub> ( <sup>4</sup> T <sub>2</sub> ) (absorption energy of <sup>4</sup> T <sub>2</sub> )           | 16313 cm <sup>-1</sup> (corresponding to 613 nm)                     |
| E <sub>Stokes</sub> (Stokes shift of the <sup>4</sup> T <sub>2</sub> - <sup>4</sup> A <sub>2</sub> transition) | 2776 cm <sup>-1</sup>                                                |
| ħω (phonon energy of <sup>4</sup> T <sub>2</sub> )                                                             | 226 cm <sup>-1</sup>                                                 |
| S( <sup>4</sup> T <sub>2</sub> ) (Huang-Rhys parameter of <sup>4</sup> T <sub>2</sub> )                        | 6.14                                                                 |
| Sħω                                                                                                            | 1388 cm <sup>-1</sup>                                                |
